# Supplementary material for: Effects of temperature on microstructures of MSA-type electroplating solution: a coarse-grained molecular dynamics simulation
Source: Royal Society of Chemistry journal article supplement (doi:10.1039/d3cp03342b), 2023-01-01
Supplement: d3cp03342b1.pdf [file d3cp03342b1.pdf]

## Supplementary Information

### Effects of Temperature on Microstructures of MSA-type Electroplating Solution: A Coarse-grained Molecular Dynamics Simulation

Teng Li,<sup>ab</sup> Ce Liang,<sup>\*a</sup> Kaifeng Yu,<sup>a</sup> Jichen Li,<sup>\*bc</sup> Chengjiang Lin,<sup>bc</sup> Hongfei Li,<sup>\*bc</sup>  
Yongzi Xu,<sup>d</sup> Shanshan Cai,<sup>\*d</sup> Qingsheng Zhu,<sup>e</sup> Qingrong Huang,<sup>f</sup> Wei Xing,<sup>\*gh</sup> and  
Xiaozheng Duan<sup>\*b</sup>

<sup>a</sup> Key Laboratory of Automobile Materials, Ministry of Education and College of Materials Science and Engineering, Jilin University, Changchun, Jilin 130025, China

<sup>b</sup> State Key Laboratory of Polymer Physics and Chemistry, Changchun Institute of Applied Chemistry, Chinese Academy of Sciences, Changchun 130022, China

<sup>c</sup> School of Applied Chemistry and Engineering, University of Science and Technology of China, Hefei 230026, China

<sup>d</sup> Research & Development Center, Yunnan Stannous Group (Holding) Co., Ltd., Kunming 650000, China

<sup>e</sup> Shenyang National Laboratory for Materials Science, Institute of Metal Research, Chinese Academy of Sciences, Shenyang 110179, China

<sup>f</sup> Department of Food Science, Rutgers University, 65 Dudley Road, New Brunswick, New Jersey 08901, United States

<sup>g</sup> Laboratory of Advanced Power Sources, Changchun Institute of Applied Chemistry, Chinese Academy of Sciences, Changchun 130022, China

<sup>h</sup> State Key Laboratory of Electroanalytical Chemistry, Changchun Institute of Applied Chemistry, Chinese Academy of Sciences, Changchun 130022, China

\* Corresponding authors

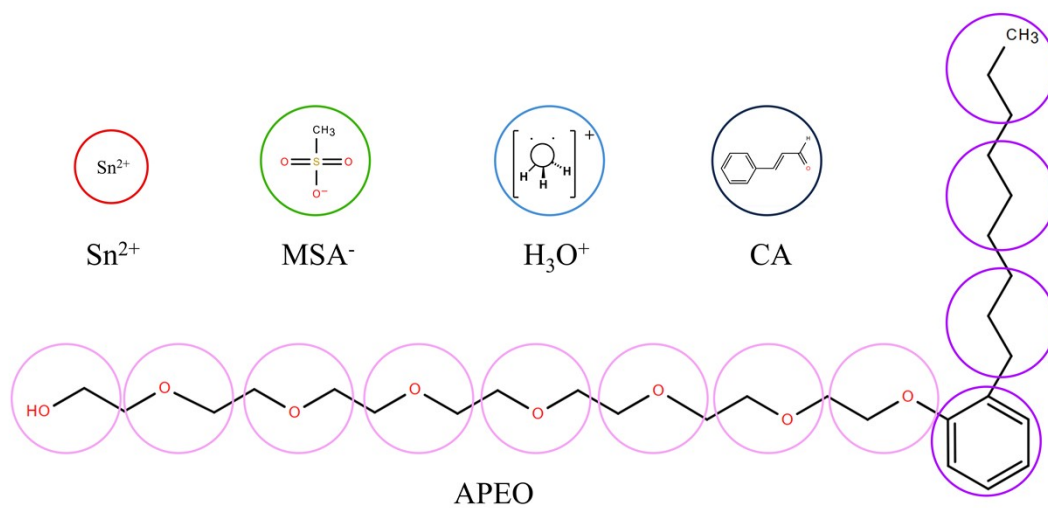

**Fig. S1** The chemical structures of simulated molecules.
